# Supplementary material
Source: ML conference proceedings conference paper supplement (https://proceedings.mlr.press/v37/wangb15.html)
Supplement: Supplementary file [file wangb15-supp.pdf]

---

## Supplementary material for On Deep Multi-View Representation Learning

---

**Weiran Wang**

Toyota Technological Institute at Chicago

WEIRANWANG@TTIC.EDU

**Raman Arora**

Johns Hopkins University

ARORA@CS.JHU.EDU

**Karen Livescu**

Toyota Technological Institute at Chicago

KLIVESCU@TTIC.EDU

**Jeff Bilmes**

University of Washington, Seattle

BILMES@EE.WASHINGTON.EDU

In this supplementary material, we give visualizations of projected view 1 test images of the noisy MNIST dataset by all feature learning algorithms in Figure 1 (including an embedding of input features with images) and Figure 2.

### References

Vladymyrov, Max and Carreira-Perpiñán, Miguel Á. Partial-Hessian strategies for fast learning of nonlinear embeddings. In *Proc. of the 29th Int. Conf. Machine Learning (ICML 2012)*, pp. 345–352, 2012.

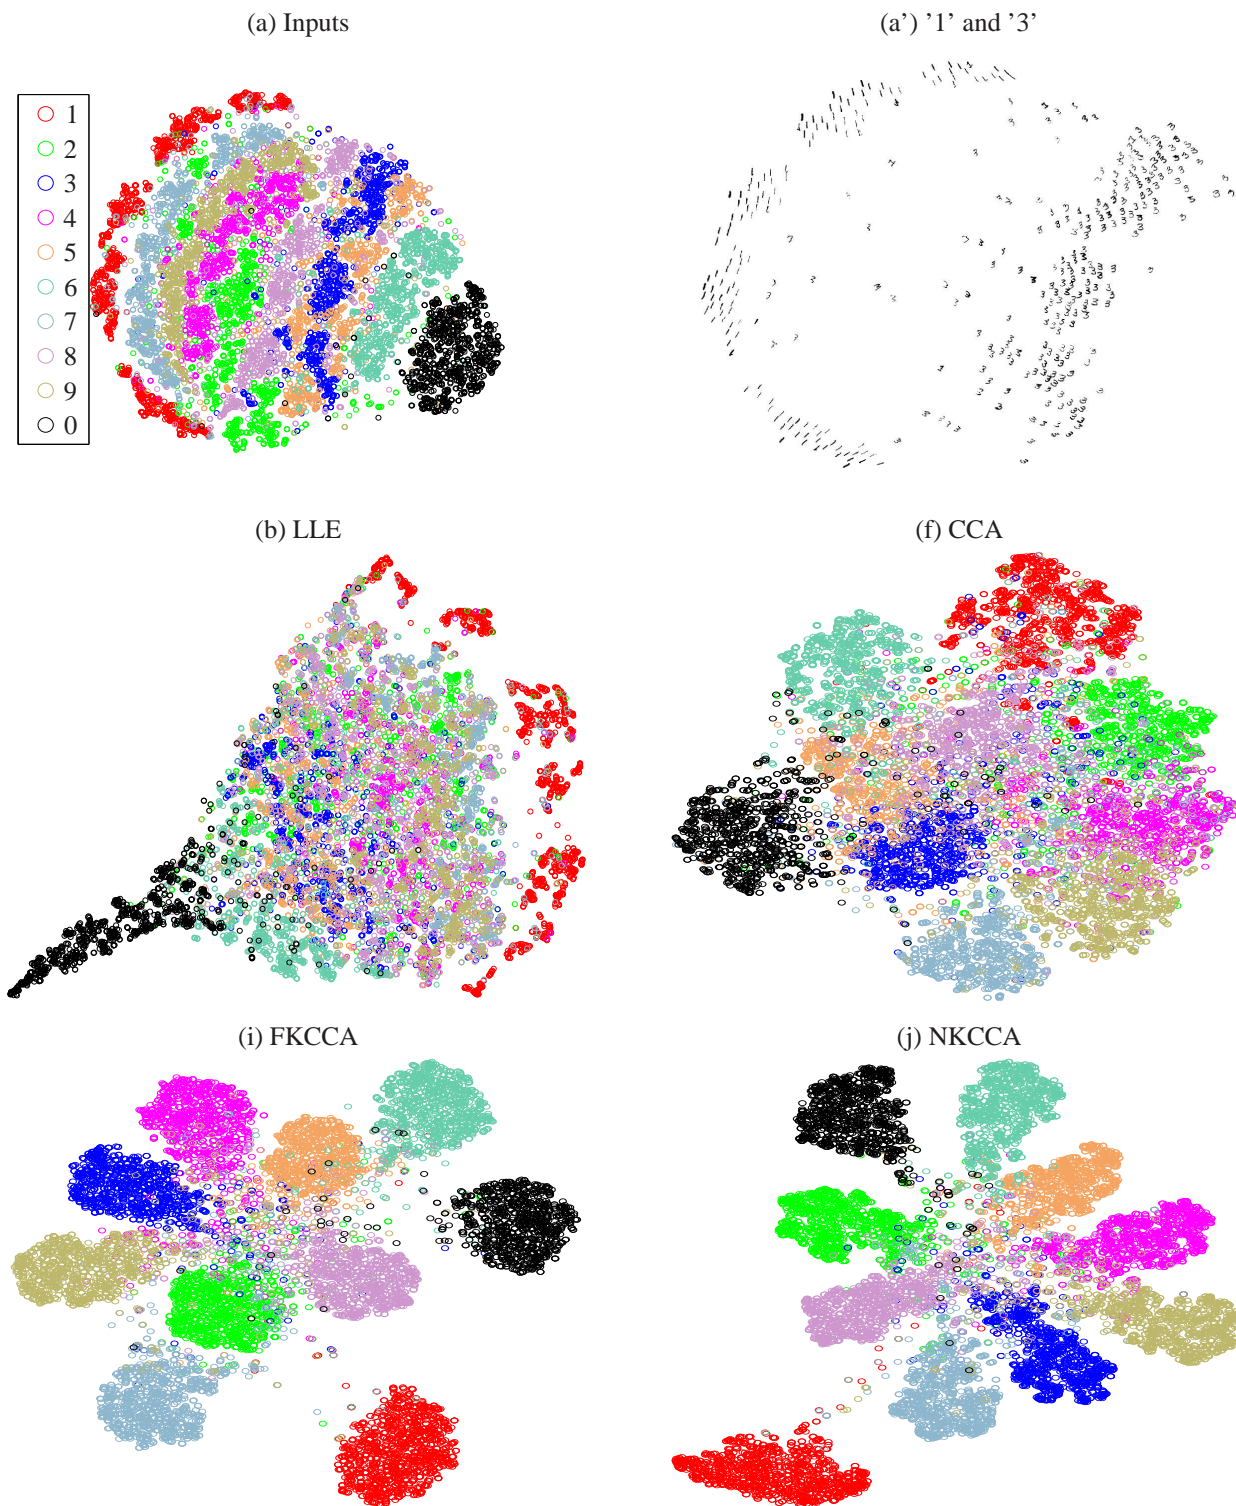

Figure 1. *t*-SNE embedding of the projected test set of noisy MNIST digits by different algorithms. Each sample is denoted by a marker located at its coordinates of embedding and color coded by its identity, except in (a') where the actual input image is shown for samples of classes '1' and '3'. Neither the feature learning algorithms nor *t*-SNE is aware of the class information. We have run the *t*-SNE implementation of Vladymyrov & Carreira-Perpiñán (2012) on the 10 000 projected test images for 300 iterations with a perplexity of 20.

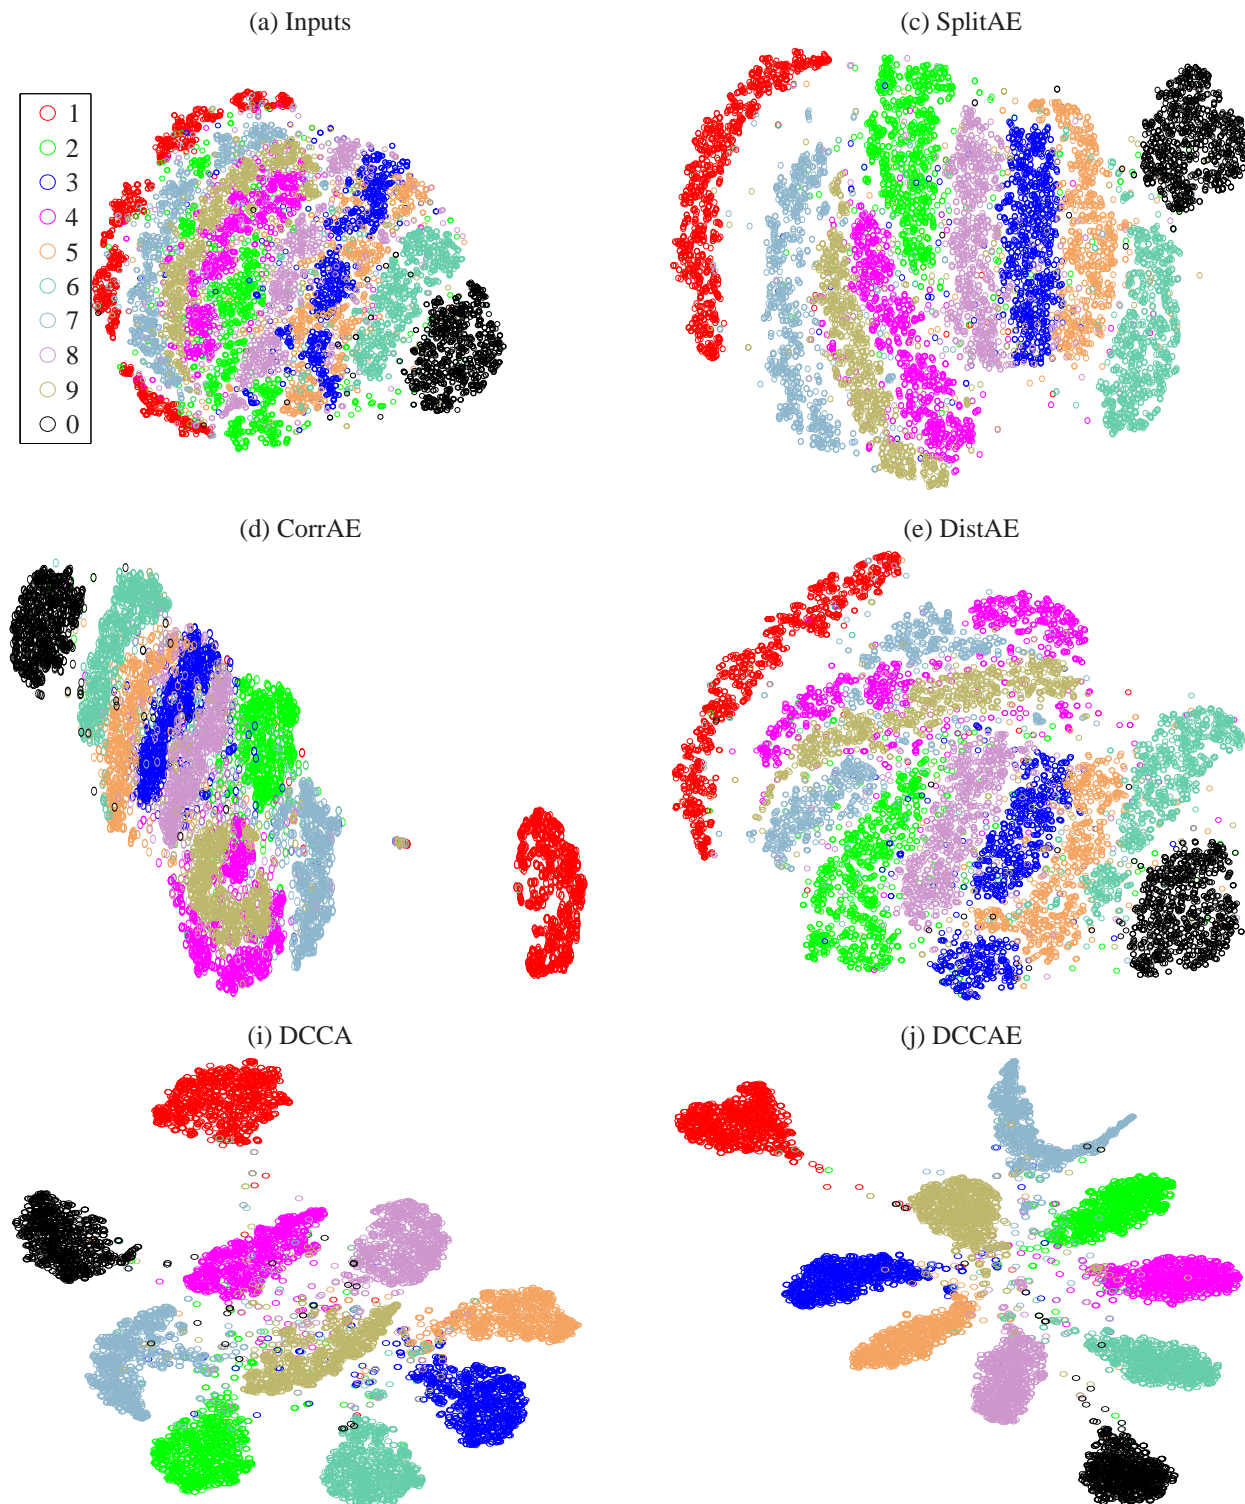

Figure 2.  $t$ -SNE embedding of the projected test set of noisy MNIST digits by different algorithms. Each sample is denoted by a marker located at its coordinates of embedding and color coded by its identity. Neither the feature learning algorithms nor  $t$ -SNE is aware of the class information. We have run the  $t$ -SNE implementation of Vladymyrov & Carreira-Perpiñán (2012) on the 10 000 projected test images for 300 iterations with a perplexity of 20.
